# Supplementary material for: Robust Neutralizing Antibody Levels Detected after Either SARS-CoV-2 Vaccination or One Year after Infection
Source: MDPI journal article supplement (doi:10.3390/v13102003), 2021-10-05
Supplement: s1 [file s1]

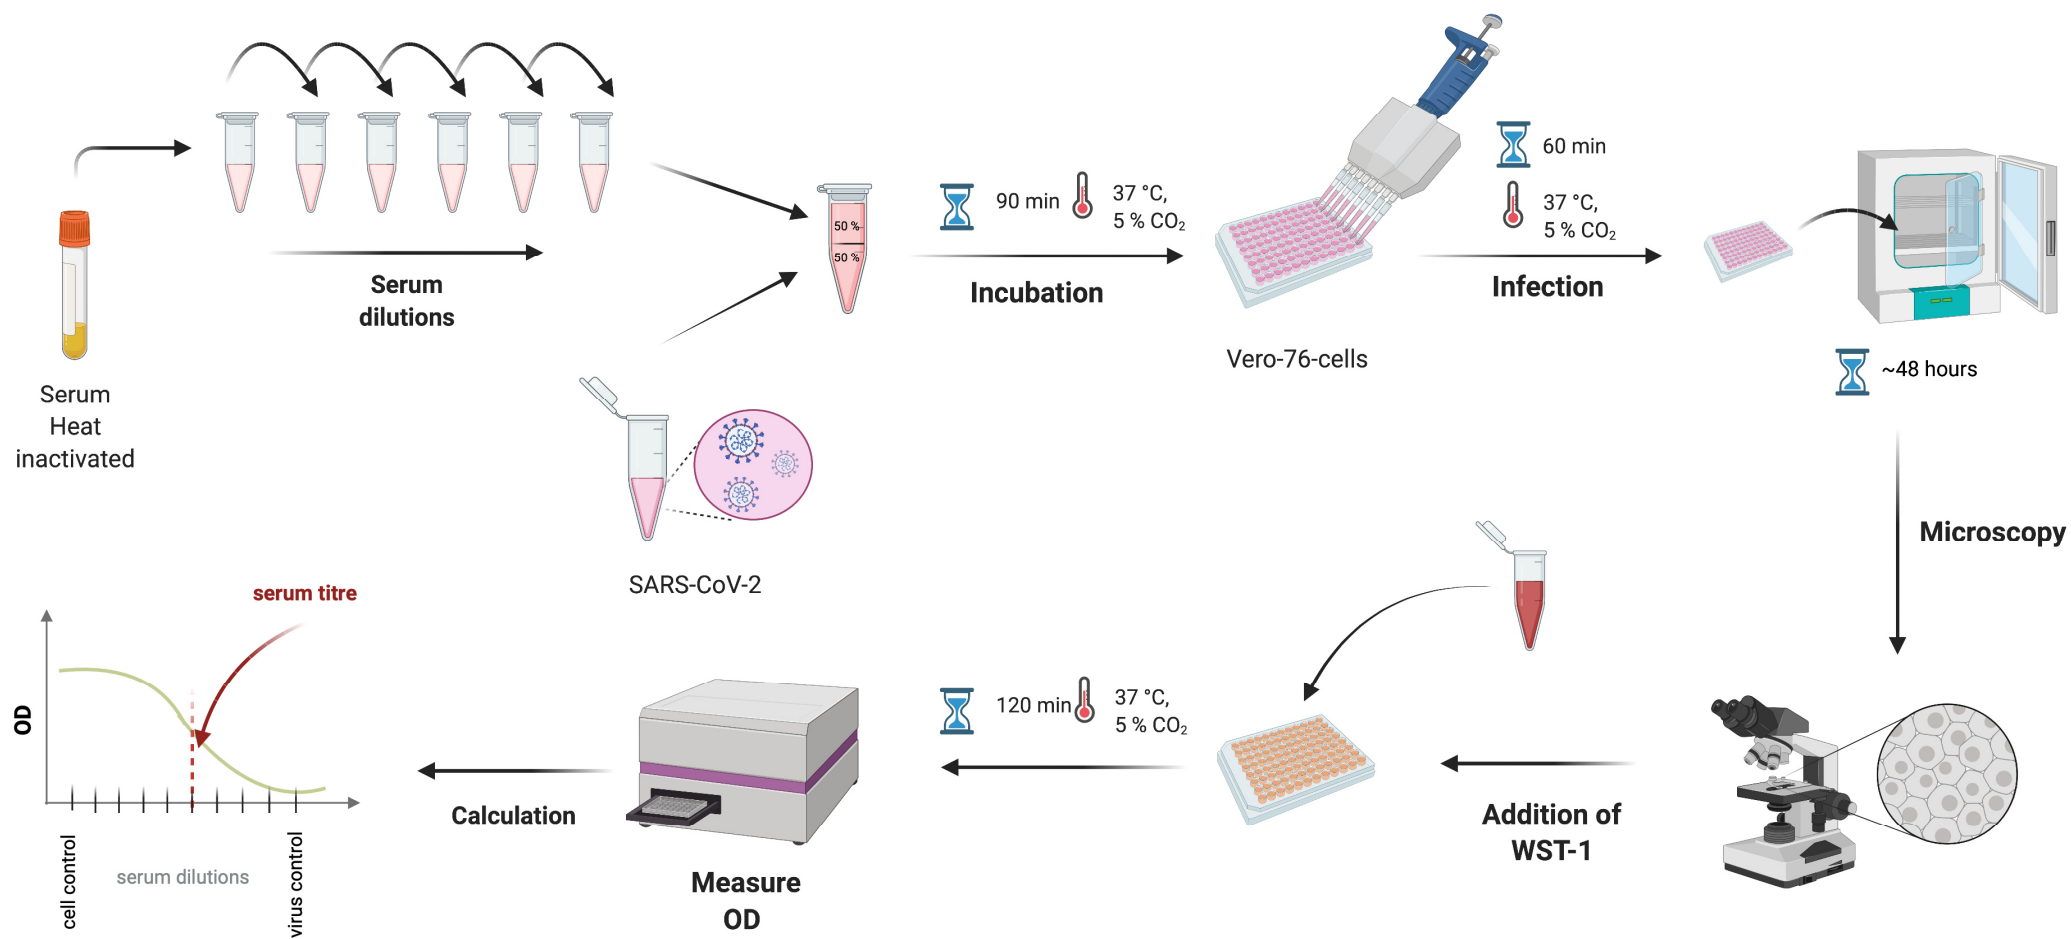

**Supplementary Figure S1.** Workflow of the neutralization assay. Figure created with BioRender.com

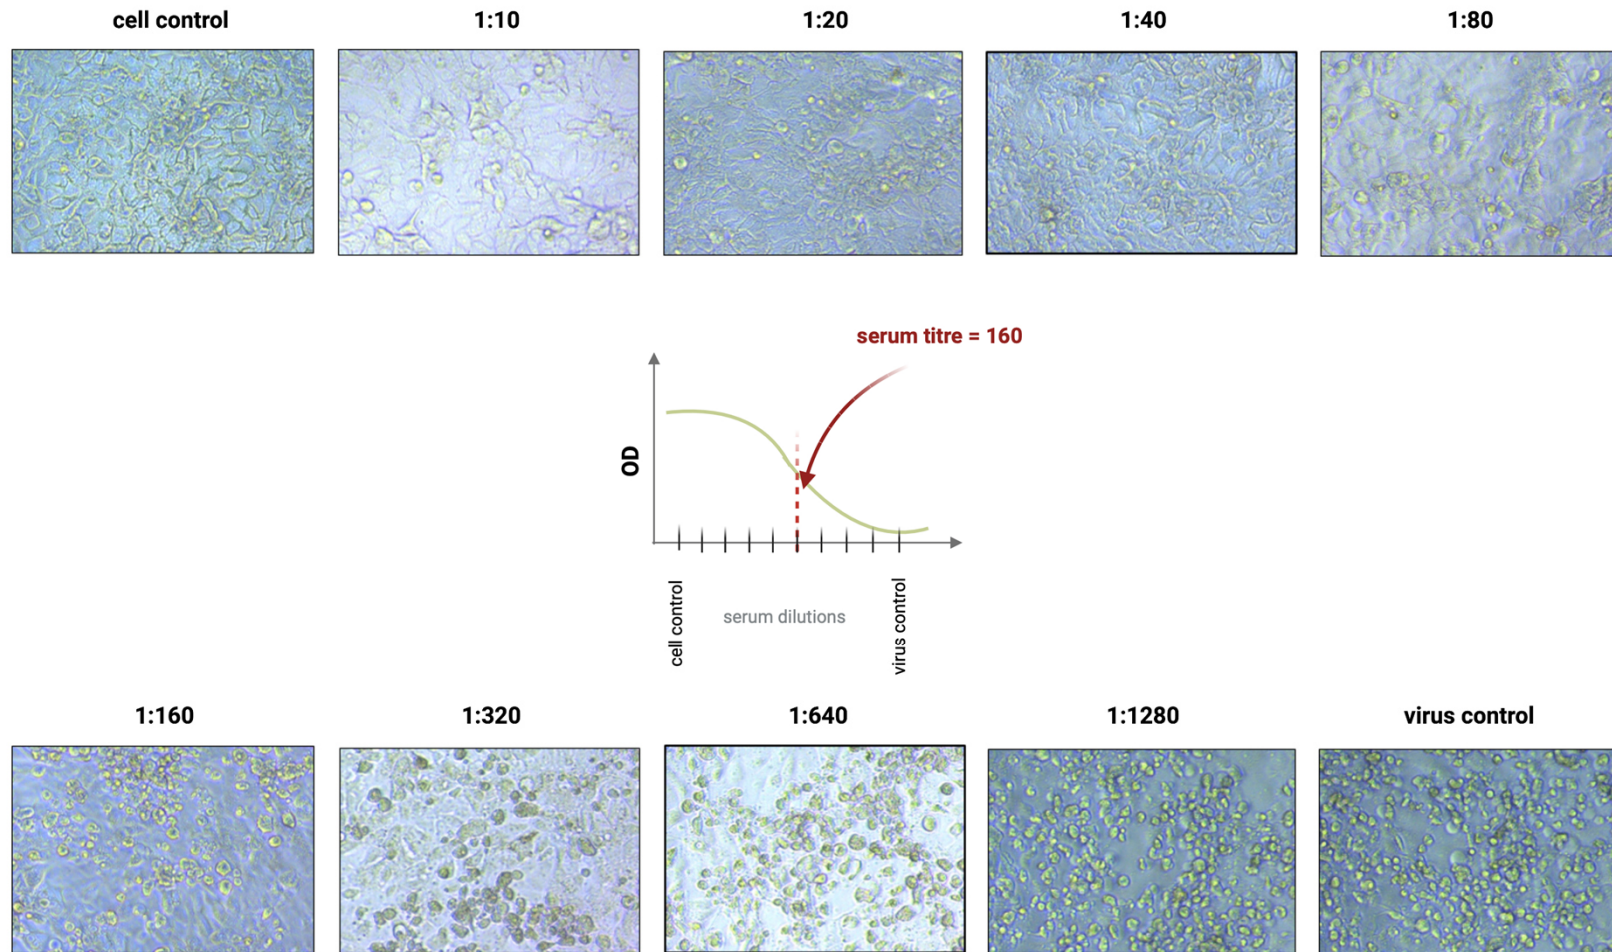

**Supplementary Figure S2.** Bright-field microscopical images of Vero 76 cells after 48 h of infection, prior to the WST-1-assay. These images reflect the qualitative outcome of viable and intact cells in the cell control (CC), the sufficient cytopathic effect of the virus control (VC) without serum and particularly the effect of the diluted patient serum on the cell viability. For this specific patient, the cells incubated with virus and 1:160 serum dilution show first cytopathic signs. This microscopical outcome was subsequently validated with quantitative OD values gained by the WST-assay. The calculated neutralization titer, determined as the serum dilution at which cell viability was reduced by 50 % corresponding to the values for the CC and the VC, confirmed the titer of 160. Figure created with BioRender.com

**Supplementary Table S1.** Basic data of recruited subjects after SARS-CoV-2 infection.

| <b>ID</b>  | <b>sex</b> | <b>age</b> | <b>severity of disease</b> | <b>vaccinated after 6-months follow-up</b> |
|------------|------------|------------|----------------------------|--------------------------------------------|
| POSTINF-1  | f          | 71         | asymptomatic               | no                                         |
| POSTINF-2  | m          | 64         | asymptomatic               | no                                         |
| POSTINF-3  | m          | 45         | asymptomatic               | no                                         |
| POSTINF-4  | f          | 52         | asymptomatic               | no                                         |
| POSTINF-5  | m          | 73         | asymptomatic               | no                                         |
| POSTINF-6  | m          | 56         | asymptomatic               | no                                         |
| POSTINF-7  | f          | 62         | mild                       | no                                         |
| POSTINF-8  | m          | 67         | mild                       | no                                         |
| POSTINF-9  | f          | 51         | mild                       | no                                         |
| POSTINF-10 | m          | 68         | mild                       | no                                         |
| POSTINF-11 | f          | 63         | mild                       | no                                         |
| POSTINF-12 | f          | 39         | mild                       | no                                         |
| POSTINF-13 | f          | 68         | mild                       | no                                         |
| POSTINF-14 | m          | 53         | mild                       | no                                         |
| POSTINF-15 | m          | 58         | mild                       | no                                         |
| POSTINF-16 | f          | 83         | mild                       | no                                         |
| POSTINF-17 | m          | 78         | mild                       | no                                         |
| POSTINF-18 | m          | 76         | mild                       | no                                         |
| POSTINF-19 | f          | 58         | mild                       | no                                         |
| POSTINF-20 | f          | 54         | mild                       | no                                         |
| POSTINF-21 | f          | 52         | mild                       | no                                         |
| POSTINF-22 | m          | 59         | mild                       | no                                         |
| POSTINF-23 | m          | 50         | mild                       | no                                         |
| POSTINF-24 | m          | 58         | mild                       | no                                         |
| POSTINF-25 | m          | 69         | mild                       | no                                         |
| POSTINF-26 | f          | 81         | mild                       | no                                         |
| POSTINF-27 | m          | 72         | moderate                   | no                                         |
| POSTINF-28 | f          | 45         | moderate                   | no                                         |
| POSTINF-29 | m          | 68         | moderate                   | no                                         |
| POSTINF-30 | m          | 41         | moderate                   | no                                         |
| POSTINF-31 | f          | 68         | moderate                   | no                                         |
| POSTINF-32 | f          | 71         | moderate                   | no                                         |
| POSTINF-33 | m          | 74         | moderate                   | no                                         |
| POSTINF-34 | m          | 80         | moderate                   | no                                         |
| POSTINF-35 | f          | 76         | moderate                   | no                                         |
| POSTINF-36 | m          | 62         | moderate                   | no                                         |
| POSTINF-37 | f          | 53         | mild                       | <i>yes</i>                                 |
| POSTINF-38 | f          | 55         | mild                       | <i>yes</i>                                 |
| POSTINF-39 | f          | 70         | mild                       | <i>yes</i>                                 |
| POSTINF-40 | m          | 73         | mild                       | <i>yes</i>                                 |

**Supplementary Table S2.** Basic data of recruited subjects after SARS-CoV-2 vaccination. AZ = AZD1222, BT = BNT162b2, MO = mRNA-1273.

| ID                              | sex | age | vaccination regimen | days between prime and booster vaccination |
|---------------------------------|-----|-----|---------------------|--------------------------------------------|
| <i>Homologous vaccination</i>   |     |     |                     |                                            |
| HOMVAC-1                        | m   | 27  | BT/BT               | 21                                         |
| HOMVAC-2                        | f   | 62  | BT/BT               | 21                                         |
| HOMVAC-3                        | m   | 35  | BT/BT               | 21                                         |
| HOMVAC-4                        | f   | 45  | BT/BT               | 21                                         |
| HOMVAC-5                        | f   | 26  | BT/BT               | 21                                         |
| HOMVAC-6                        | f   | 43  | BT/BT               | 21                                         |
| HOMVAC-7                        | f   | 44  | BT/BT               | 21                                         |
| HOMVAC-8                        | f   | 30  | BT/BT               | 21                                         |
| HOMVAC-9                        | f   | 62  | BT/BT               | 21                                         |
| HOMVAC-10                       | f   | 36  | BT/BT               | 21                                         |
| HOMVAC-11                       | f   | 60  | BT/BT               | 21                                         |
| HOMVAC-12                       | f   | 48  | BT/BT               | 21                                         |
| HOMVAC-13                       | f   | 49  | BT/BT               | 21                                         |
| HOMVAC-14                       | f   | 53  | BT/BT               | 21                                         |
| HOMVAC-15                       | f   | 45  | BT/BT               | 21                                         |
| HOMVAC-16                       | m   | 29  | BT/BT               | 21                                         |
| HOMVAC-17                       | m   | 26  | BT/BT               | 21                                         |
| HOMVAC-18                       | f   | 46  | BT/BT               | 21                                         |
| HOMVAC-19                       | m   | 28  | BT/BT               | 21                                         |
| HOMVAC-20                       | f   | 40  | BT/BT               | 21                                         |
| HOMVAC-21                       | m   | 53  | BT/BT               | 19                                         |
| HOMVAC-22                       | f   | 59  | BT/BT               | 21                                         |
| <i>Heterologous vaccination</i> |     |     |                     |                                            |
| HETVAC-1                        | f   | 36  | AZ/BT               | 85                                         |
| HETVAC-2                        | m   | 30  | AZ/MO               | 84                                         |
| HETVAC-3                        | f   | 41  | AZ/MO               | 84                                         |
| HETVAC-4                        | f   | 34  | AZ/BT               | 52                                         |
| HETVAC-5                        | f   | 53  | AZ/MO               | 84                                         |
| HETVAC-6                        | f   | 56  | AZ/MO               | 84                                         |
| HETVAC-7                        | m   | 32  | AZ/MO               | 84                                         |
| HETVAC-8                        | f   | 38  | AZ/MO               | 84                                         |
| HETVAC-9                        | f   | 28  | AZ/MO               | 84                                         |
| HETVAC-10                       | f   | 47  | AZ/MO               | 84                                         |
| HETVAC-11                       | f   | 26  | AZ/MO               | 84                                         |
| HETVAC-12                       | f   | 35  | AZ/MO               | 84                                         |
| HETVAC-13                       | m   | 25  | AZ/MO               | 84                                         |
| HETVAC-14                       | f   | 34  | AZ/MO               | 84                                         |
| HETVAC-15                       | f   | 41  | AZ/MO               | 84                                         |
| HETVAC-16                       | f   | 36  | AZ/MO               | 84                                         |
| HETVAC-17                       | f   | 31  | AZ/MO               | 84                                         |
| HETVAC-18                       | m   | 40  | AZ/MO               | 84                                         |
| HETVAC-19                       | f   | 46  | AZ/MO               | 84                                         |
| HETVAC-20                       | m   | 36  | AZ/MO               | 82                                         |
| HETVAC-21                       | f   | 57  | AZ/MO               | 84                                         |

**Supplementary Table S3.** Longitudinal course of S-IgG concentrations and neutralization capacity of 40 subjects after SARS-CoV-2 infection.

| ID         | 7 weeks post-infection |                         | 6-months follow-up |                         | 12-months follow-up |                         |
|------------|------------------------|-------------------------|--------------------|-------------------------|---------------------|-------------------------|
|            | S-IgG in<br>BAU/ml     | neutralization<br>titer | S-IgG in<br>BAU/ml | neutralization<br>titer | S-IgG in<br>BAU/ml  | neutralization<br>titer |
| POSTINF-1  | 591                    | 40                      | 134                | 20                      | 101                 | N/A                     |
| POSTINF-2  | 1060                   | 320                     | 106                | 80                      | 49.7                | N/A                     |
| POSTINF-3  | 210                    | 0                       | 39.3               | 0                       | 29.1                | N/A                     |
| POSTINF-4  | 148                    | 0                       | 54.2               | 80                      | 50.4                | N/A                     |
| POSTINF-5  | 579                    | 20                      | 195                | 20                      | 165                 | 160                     |
| POSTINF-6  | 144                    | 160                     | 52.5               | 20                      | 62                  | 40                      |
| POSTINF-7  | 1800                   | 160                     | 179                | 40                      | 87.6                | 80                      |
| POSTINF-8  | 573                    | 0                       | 169                | 80                      | 167                 | N/A                     |
| POSTINF-9  | 1910                   | 80                      | 328                | 20                      | 221                 | N/A                     |
| POSTINF-10 | 231                    | 20                      | 34.1               | 80                      | 25.9                | N/A                     |
| POSTINF-11 | 1210                   | 320                     | 508                | 320                     | 476                 | 1280                    |
| POSTINF-12 | 71.5                   | 0                       | 197                | 10                      | 168                 | N/A                     |
| POSTINF-13 | 573                    | 0                       | 107                | 80                      | 144                 | N/A                     |
| POSTINF-14 | 402                    | 80                      | 58.5               | 10                      | 38.4                | N/A                     |
| POSTINF-15 | 777                    | 10                      | 315                | 160                     | 140                 | N/A                     |
| POSTINF-16 | 1030                   | 160                     | 293                | 160                     | 213                 | N/A                     |
| POSTINF-17 | 1280                   | 640                     | 1210               | 80                      | 651                 | N/A                     |
| POSTINF-18 | 140                    | 10                      | 69.2               | 320                     | 82.1                | N/A                     |
| POSTINF-19 | 101                    | 20                      | 41.3               | 10                      | 24.9                | N/A                     |
| POSTINF-20 | 234                    | 20                      | 116                | 10                      | 78.1                | N/A                     |
| POSTINF-21 | 651                    | 40                      | 147                | 40                      | 31.6                | 160                     |
| POSTINF-22 | 269                    | 40                      | 54.2               | 40                      | 22.9                | 40                      |
| POSTINF-23 | 1260                   | 80                      | 880                | 80                      | 803                 | N/A                     |
| POSTINF-24 | 22.3                   | 0                       | 23.5               | 0                       | 19.8                | N/A                     |
| POSTINF-25 | 958                    | 80                      | 103                | 160                     | 61.1                | N/A                     |
| POSTINF-26 | 410                    | 80                      | 65.4               | 20                      | 36.3                | 320                     |
| POSTINF-27 | 2950                   | 160                     | 833                | 160                     | 638                 | N/A                     |
| POSTINF-28 | 82                     | 160                     | 15.7               | 0                       | 10.4                | 160                     |
| POSTINF-29 | 2960                   | 320                     | 741                | 320                     | 333                 | 320                     |
| POSTINF-30 | 458                    | 40                      | 83.4               | 20                      | 73.6                | N/A                     |
| POSTINF-31 | 2040                   | 320                     | 613                | 160                     | 639                 | N/A                     |
| POSTINF-32 | 1160                   | 20                      | 260                | 160                     | 325                 | 160                     |
| POSTINF-33 | 1490                   | 10                      | 231                | 80                      | 130                 | N/A                     |
| POSTINF-34 | 1100                   | 160                     | 1030               | 160                     | 458                 | N/A                     |
| POSTINF-35 | 4060                   | 80                      | 617                | 160                     | 564                 | 160                     |
| POSTINF-36 | 187                    | 40                      | 17.1               | 20                      | 9.76                | N/A                     |
| POSTINF-37 | 191                    | 40                      | 426                | 40                      | 1270                | 80                      |
| POSTINF-38 | 314                    | 10                      | 82.7               | 10                      | 24000               | 640                     |
| POSTINF-39 | 1360                   | 80                      | 317                | 160                     | 13800               | 1280                    |
| POSTINF-40 | 220                    | 40                      | 59.7               | 20                      | 2040                | 640                     |

**Supplementary Table S4.** S-IgG concentrations of 43 subjects 0-16 weeks after vaccination.

| ID                              | S-IgG concentration in BAU/ml over time (in weeks) |       |      |      |       |       |       |       |
|---------------------------------|----------------------------------------------------|-------|------|------|-------|-------|-------|-------|
|                                 | 0                                                  | 1     | 2    | 3    | 4     | 5     | 8     | 16    |
| <i>Homologous vaccination</i>   |                                                    |       |      |      |       |       |       |       |
| HOMVAC-1                        | 4.96                                               | 80.1  | 1060 | 1110 | 6640  | 4140  | 2850  | 1830  |
| HOMVAC-2                        | <4.81                                              | <4.81 | 330  | 408  | 9870  | 10800 | 5040  | 1640  |
| HOMVAC-3                        | <4.81                                              | <4.81 | 89.8 | 64.8 | 1140  | 957   | 963   | 610   |
| HOMVAC-4                        | <4.81                                              | 69.7  | 163  | 108  | 1400  | 1280  | 1090  | 705   |
| HOMVAC-5                        | <4.81                                              | <4.81 | 476  | 437  | 10500 | 9690  | 5880  | 1590  |
| HOMVAC-6                        | <4.81                                              | 6.66  | N/A  | 261  | 3990  | N/A   | 2020  | 1220  |
| HOMVAC-7                        | <4.81                                              | <4.81 | 82.1 | 85   | 2130  | 2670  | 1780  | 397   |
| HOMVAC-8                        | <4.81                                              | 12.5  | 1190 | 2660 | 12000 | 32700 | 14200 | 1770  |
| HOMVAC-9                        | <4.81                                              | N/A   | 45.8 | 51.9 | 1120  | 974   | 774   | 402   |
| HOMVAC-10                       | <4.81                                              | 13.6  | 248  | 259  | 1910  | 1820  | 1280  | 489   |
| HOMVAC-11                       | <4.81                                              | 9.84  | 159  | 106  | 1910  | 1650  | 742   | 250   |
| HOMVAC-12                       | <4.81                                              | <4.81 | 484  | 539  | 4930  | 3450  | 1580  | 891   |
| HOMVAC-13                       | <4.81                                              | <4.81 | 128  | 182  | 5310  | 4280  | 1640  | 1000  |
| HOMVAC-14                       | <4.81                                              | <4.81 | 200  | 103  | 1320  | 1310  | 710   | 249   |
| HOMVAC-15                       | <4.81                                              | <4.81 | 103  | 76.8 | 1000  | 762   | 486   | 270   |
| HOMVAC-16                       | <4.81                                              | 35.1  | 263  | 228  | 6130  | 3980  | 2070  | 1230  |
| HOMVAC-17                       | <4.81                                              | <4.81 | 446  | 492  | 6720  | 6690  | 4240  | 1810  |
| HOMVAC-18                       | <4.81                                              | <4.81 | 391  | 446  | 4570  | 5360  | N/A   | 1510  |
| HOMVAC-19                       | <4.81                                              | <4.81 | 317  | 298  | 2550  | 2290  | 1350  | 568   |
| HOMVAC-20                       | N/A                                                | <4.81 | 321  | 244  | 5350  | 3680  | 1730  | 1230  |
| HOMVAC-21                       | N/A                                                | <4.81 | 105  | 139  | 3750  | 4210  | 1900  | 1190  |
| HOMVAC-22                       | <4.81                                              | <4.81 | 148  | 136  | 1020  | 1970  | 1160  | 602   |
| <i>Heterologous vaccination</i> |                                                    |       |      |      |       |       |       |       |
| HETVAC-1                        | <4.81                                              | <4.81 | 66.8 | 122  | 150   | 248   | 357   | 4590  |
| HETVAC-2                        | <4.81                                              | <4.81 | 30.7 | 391  | 309   | 236   | 56.2  | 12600 |
| HETVAC-3                        | <4.81                                              | <4.81 | 66.3 | 193  | 177   | N/A   | 111   | 3840  |
| HETVAC-4                        | <4.81                                              | <4.81 | 112  | 344  | 304   | 227   | 142   | N/A   |
| HETVAC-5                        | <4.81                                              | <4.81 | 10.6 | 13.8 | 12.1  | 9.4   | 7.82  | 1500  |
| HETVAC-6                        | 8.59                                               | 8.81  | 68.1 | 170  | N/A   | 138   | 95.5  | 1860  |
| HETVAC-7                        | <4.81                                              | <4.81 | 91.9 | N/A  | 130   | 93.2  | 42.2  | 3000  |
| HETVAC-8                        | <4.81                                              | <4.81 | 8.41 | 26.2 | 37.1  | 43.4  | 41.5  | 2150  |
| HETVAC-9                        | <4.81                                              | <4.81 | 23.4 | 54   | 46.9  | 38.5  | 17.5  | 399   |
| HETVAC-10                       | <4.81                                              | <4.81 | 112  | 130  | 109   | 82.8  | 15.2  | 3150  |
| HETVAC-11                       | <4.81                                              | <4.81 | 21.1 | 83.6 | N/A   | 86.9  | 30.5  | 5840  |
| HETVAC-12                       | <4.81                                              | <4.81 | 14.8 | 93.9 | 108   | 89.2  | 11.4  | 1030  |
| HETVAC-13                       | 19.2                                               | 1000  | 1770 | 1420 | 1140  | 1030  | 363   | 4150  |
| HETVAC-14                       | <4.81                                              | <4.81 | 215  | N/A  | 273   | 221   | 45.2  | 3100  |
| HETVAC-15                       | <4.81                                              | <4.81 | 63.2 | 63.5 | 55.2  | 48.6  | 27.9  | 969   |
| HETVAC-16                       | <4.81                                              | <4.81 | 11   | 31.2 | 28.1  | 24.7  | 14.9  | 1960  |
| HETVAC-17                       | <4.81                                              | <4.81 | 152  | 381  | 313   | 260   | 129   | 9590  |
| HETVAC-18                       | <4.81                                              | <4.81 | 77.2 | N/A  | N/A   | N/A   | 33.1  | 1460  |
| HETVAC-19                       | <4.81                                              | <4.81 | 28   | 56.6 | 64.3  | 54.7  | 21.4  | 1300  |
| HETVAC-20                       | <4.81                                              | <4.81 | 18.1 | 21.4 | 24.6  | 22.3  | 14.2  | 1390  |
| HETVAC-21                       | <4.81                                              | <4.81 | 206  | 336  | 313   | 283   | 123   | 5140  |
